# Supplementary material for: Retinal and Choroidal Thinning—A Predictor of Coronary Artery Occlusion?
Source: MDPI journal article supplement (doi:10.3390/diagnostics12082016), 2022-08-20
Supplement: s1 [file s1]

## SUPPLEMENTS

Table S1. Comparison of retinal and choroidal thickness parameters between groups.

|                                                                                                                                                  | Healthy<br>Median (range)              | MI group<br>Median (range)           | 3VD group<br>Median (range)              |
|--------------------------------------------------------------------------------------------------------------------------------------------------|----------------------------------------|--------------------------------------|------------------------------------------|
| <b>Retinal thickness</b>                                                                                                                         |                                        |                                      |                                          |
| Central                                                                                                                                          | 249.5 (205.0-313.0)                    | 249.5 (194.0-298.0)                  | 246.0 (212.0-363.0)                      |
| Inner circle                                                                                                                                     | 310.9 (278.8-350.0) <sup>1</sup>       | 305.1 (272.5-341.8) <sup>1</sup>     | 308.0 (270.5-325.0)                      |
| Outer circle                                                                                                                                     | 272.3 (239.0-306.0) <sup>2, 3, 4</sup> | 263.8 (236.5-301.5) <sup>3, 4</sup>  | 263.0 (229.0-280.8) <sup>2, 3</sup>      |
| Statistical significance: 1 – $p=0.044$ ; 2 – $p=0.010$ ; 3 – $p=0.013$ ; 4 – $p=0.021$ .                                                        |                                        |                                      |                                          |
| <b>RNFL layer</b>                                                                                                                                |                                        |                                      |                                          |
| Central                                                                                                                                          | 6.0 (1.0-20.0)                         | 7.0 (1.0-22.0)                       | 7.0 (2.0-19.0)                           |
| Inner circle                                                                                                                                     | 27.0 (21.5-44.3)                       | 27.6 (21.5-62.3)                     | 28.5 (22.8-49.3)                         |
| Outer circle                                                                                                                                     | 41.3 (32.5-58.8)                       | 39.6 (30.3-78.0)                     | 41.0 (32.0-62.3)                         |
| <b>GCL++ layer</b>                                                                                                                               |                                        |                                      |                                          |
| Central                                                                                                                                          | 57.0 (34.0-103.0)                      | 58.0 (20.0-81.0)                     | 57.0 (41.0-78.0)                         |
| Inner circle                                                                                                                                     | 117.1 (97.8-146.3)                     | 115.6 (92.5-144.3)                   | 115.6 (97.0-131.0)                       |
| Outer circle                                                                                                                                     | 106.3 (91.5-134.5)                     | 104.3 (85.3-142.8)                   | 103.9 (81.3-113.5)                       |
| <b>GCL+ layer</b>                                                                                                                                |                                        |                                      |                                          |
| Central                                                                                                                                          | 50.0 (32.0-85.0)                       | 50.0 (27.0-68.0)                     | 49.0 (32.0-63.0)                         |
| Inner circle                                                                                                                                     | 89.8 (72.3-112.5) <sup>5, 6, 7</sup>   | 85.9 (70.5-107.5) <sup>5, 7</sup>    | 87.4 (63.3-97.3) <sup>5, 6</sup>         |
| Outer circle                                                                                                                                     | 65.5 (52.5-83.3) <sup>8, 9</sup>       | 62.8 (50.3-77.0) <sup>8, 10</sup>    | 60.4 (44.3-68.3) <sup>8, 9, 10</sup>     |
| Statistical significance: 5 – $p=0.011$ ; 6 – $p=0.018$ ; 7 – $p=0.010$ ; 8 – $p=0.002$ ; 9 – $p<0.001$ ; 10 – $p=0.012$ .                       |                                        |                                      |                                          |
| <b>Choroidal thickness</b>                                                                                                                       |                                        |                                      |                                          |
| Central                                                                                                                                          | 252.5 (43.0-427.0) <sup>11</sup>       | 252.5 (51.0-453.0)                   | 207.0 (90.0-362.0) <sup>11</sup>         |
| Inner circle                                                                                                                                     | 253.5 (123.5-407.8) <sup>12, 14</sup>  | 252.6 (65.5-443.3) <sup>13, 14</sup> | 195.8 (96.8-327.0) <sup>12, 13, 14</sup> |
| Outer circle                                                                                                                                     | 224.0 (107.0-364.0) <sup>15, 17</sup>  | 231.5 (73.5-376.3) <sup>16</sup>     | 181.3 (92.8-291.8) <sup>15, 16, 17</sup> |
| Statistical significance: 11 – $p=0.035$ ; 12 – $p=0.005$ ; 13 – $p=0.011$ ; 14 – $p=0.016$ ; 15 – $p=0.002$ ; 16 – $p=0.003$ ; 17 – $p=0.004$ . |                                        |                                      |                                          |

*The number next to the value represents groups being compared.*

Table S2. Comparison of foveal avascular zone (FAZ) parameters between groups. Expressed as median (min.-max.). No statistically significant differences observed.

|                                                    | Healthy               | MI group              | 3VD group              |
|----------------------------------------------------|-----------------------|-----------------------|------------------------|
| 3x3                                                |                       |                       |                        |
| Superficial FAZ area, $\mu\text{m}^2$              | 282.74 (0-611.28)     | 284.55 (48.45-886.29) | 308.85 (93.87-580.43)  |
| Superficial FAZ vertical diameter, $\mu\text{m}$   | 600.0 (0.0-872.0)     | 579.5 (220.0-1153.0)  | 619.0 (380.0-926.0)    |
| Superficial FAZ horizontal diameter, $\mu\text{m}$ | 565.0 (0.0-935.0)     | 610.5 (233.0-1012.0)  | 619.0 (249.0-899.0)    |
| Deep FAZ area, $\mu\text{m}^2$                     | 227.46 (41.57-716.22) | 248.16 (44.12-700.84) | 309.38 (86.31-760.61)  |
| Deep FAZ vertical diameter, $\mu\text{m}$          | 577.0 (219.0-927.0)   | 538.5 (214.0-1028.0)  | 592.0 (316.0-966.0)    |
| Deep FAZ horizontal diameter, $\mu\text{m}$        | 593.0 (225.0-983.0)   | 581.5 (245.0-1016.0)  | 663.0 (330.0-1004.0)   |
| 6x6                                                |                       |                       |                        |
| Superficial FAZ area, $\mu\text{m}^2$              | 243.98 (54.49-608.91) | 267.71 (46.58-721.76) | 303.05 (74.18-511.52)  |
| Superficial FAZ vertical diameter, $\mu\text{m}$   | 570.0 (235.0-881.0)   | 592.0 (116.0-947.0)   | 609.0 (329.0-817.0)    |
| Superficial FAZ horizontal diameter, $\mu\text{m}$ | 545.0 (235.0-908.0)   | 571.5 (160.0-962.0)   | 614.0 (249.0-926.0)    |
| Deep FAZ area, $\mu\text{m}^2$                     | 225.70 (55.55-788.91) | 250.49 (21.45-795.59) | 300.94 (107.23-768.87) |
| Deep FAZ vertical diameter, $\mu\text{m}$          | 551.0 (245.0-944.0)   | 552.0 (160.0-981.0)   | 582.0 (338.0-939.0)    |
| Deep FAZ horizontal diameter, $\mu\text{m}$        | 607.0 (246.0-1077.0)  | 600.0 (116.0-1237.0)  | 619.0 (365.0-1017.0)   |

Table S3. Comparison of vascular density in superficial and deep capillary plexus between groups. Expressed as median (min.-max.).

|                                     | Healthy              | MI group            | 3VD group           |
|-------------------------------------|----------------------|---------------------|---------------------|
| <b>6x6</b>                          |                      |                     |                     |
| <b>Superficial capillary plexus</b> |                      |                     |                     |
| Central                             | 21.30 (10.87-28.09)* | 20.50 (7.60-30.71)  | 18.43 (11.75-25.63) |
| Nasal                               | 45.72 (40.41-51.03)* | 45.20 (35.73-50.84) | 45.21 (40.05-48.78) |
| Temporal                            | 45.78 (41.44-53.76)  | 45.86 (40.78-53.50) | 44.95 (40.38-49.37) |
| Superior                            | 48.30 (37.08-52.20)  | 47.97 (42.72-53.11) | 46.76 (41.78-54.00) |
| Inferior                            | 46.94 (41.16-52.98)  | 47.18 (40.14-57.40) | 46.97 (35.41-49.83) |
| <b>Deep capillary plexus</b>        |                      |                     |                     |
| Central                             | 19.70 (9.31-27.15)   | 18.76 (6.82-30.35)  | 17.94 (10.70-25.20) |
| Nasal                               | 49.02 (43.47-52.93)  | 48.44 (35.24-54.72) | 49.04 (44.25-51.79) |
| Temporal                            | 48.84 (43.37-59.80)  | 48.77 (42.20-54.59) | 47.80 (41.66-52.68) |
| Superior                            | 51.27 (37.66-55.95)  | 51.40 (45.44-57.28) | 50.69 (43.06-55.95) |
| Inferior                            | 50.46 (43.51-54.33)  | 49.90 (42.27-60.08) | 50.44 (37.76-53.58) |
| <b>3x3</b>                          |                      |                     |                     |
| <b>Superficial capillary plexus</b> |                      |                     |                     |
| Central                             | 21.12 (10.81-36.19)  | 20.25 (5.75-27.57)  | 18.82 (10.47-26.99) |
| Nasal                               | 46.64 (40.33-51.28)  | 46.57 (41.14-54.31) | 46.31 (42.38-49.69) |
| Temporal                            | 46.91 (40.69-50.83)  | 46.91 (42.97-52.78) | 46.08 (42.23-50.63) |
| Superior                            | 49.54 (41.01-55.30)  | 48.95 (41.41-54.08) | 48.60 (44.35-52.02) |
| Inferior                            | 49.10 (37.21-55.60)  | 48.26 (35.80-59.53) | 47.68 (36.98-52.88) |
| <b>Deep capillary plexus</b>        |                      |                     |                     |
| Central                             | 20.08 (10.56-35.15)  | 19.29 (4.3-29.39)   | 18.22 (10.00-27.14) |
| Nasal                               | 50.38 (44.36-52.24)  | 50.03 (43.92-57.97) | 49.49 (43.77-52.76) |
| Temporal                            | 50.05 (42.18-54.26)  | 49.89 (45.18-56.19) | 49.30 (45.26-53.99) |
| Superior                            | 52.87 (43.01-62.77)  | 52.42 (43.35-58.77) | 52.71 (44.44-55.68) |
| Inferior                            | 51.91 (40.44-60.47)  | 51.91 (38.62-62.12) | 51.63 (38.83-55.38) |

\*Statistically significant difference comparing healthy and 3VD group.

No other statistically significant differences observed.
